# Supplementary material for: Neurobehavioral sex-related differences in Nf1+/− mice: female show a “camouflaging”-type behavior
Source: PubMed Central journal article supplement (PMC10131355; doi:10.1186/s13293-023-00509-8), 2023-04-26
Supplement: 13293_2023_509_MOESM1_ESM.pdf [file 13293_2023_509_MOESM1_ESM.pdf]

## Additional file 1

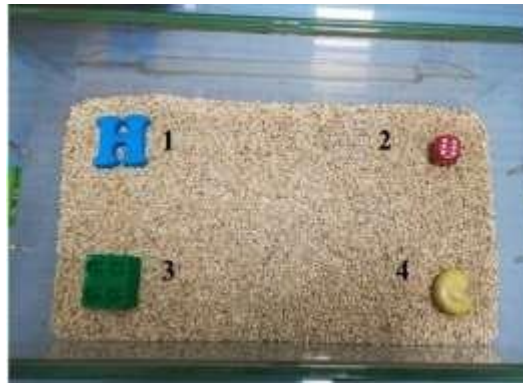

**Figure S1.** Representative image of novel object exploration test with the different objects used and the position number for sequence analysis.

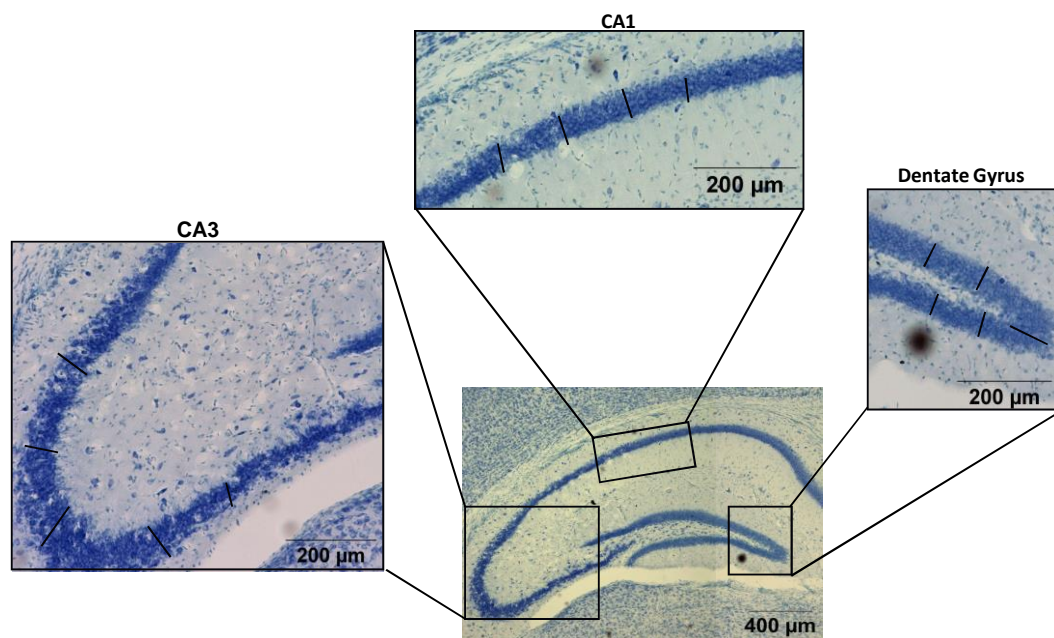

**Figure S2.** Representative image of mice hippocampus labelled with toluidine blue taken from the morphometric microscope (AX10, ZEISS, Germany). Detail images indicated the measures used to analyze thickness in each hippocampal sub-region - CA1, CA3 and DG.

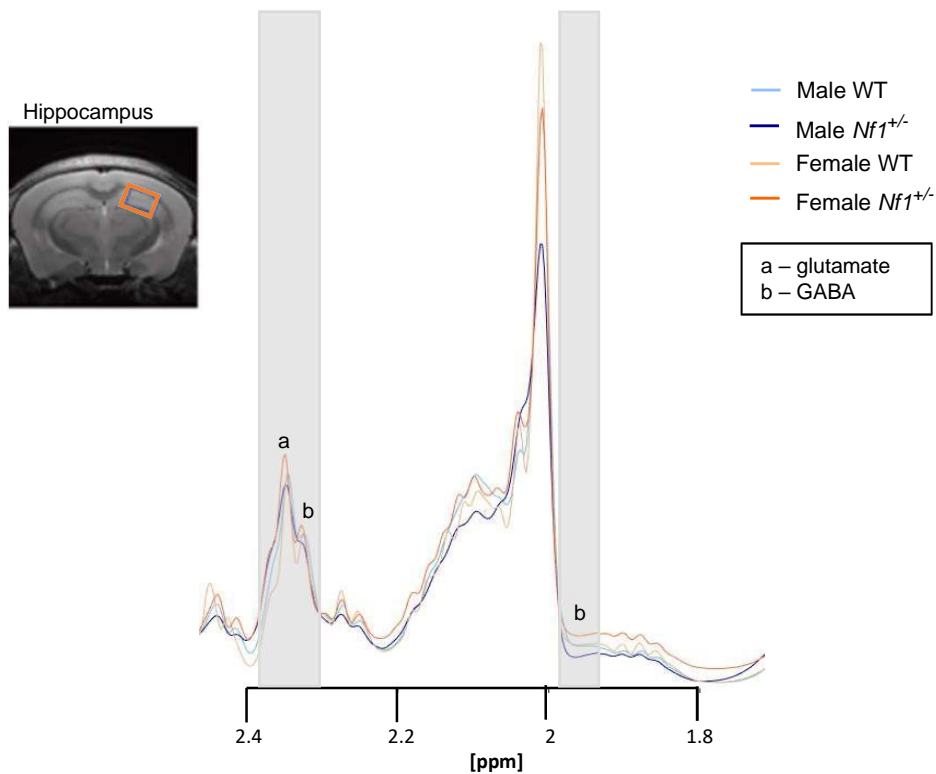

**Figure S3.** Localization of the magnetic resonance spectroscopy (MRS) voxel (orange square) in the hippocampus, as well as a MRS average plots of WT and *Nf1*<sup>+/-</sup> mice, highlighting the peaks of GABA and glutamate.

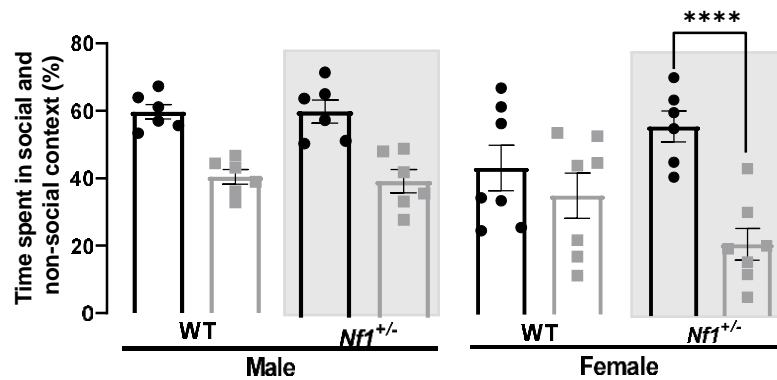

**Figure S4.** Female *Nf1*<sup>+/-</sup> display an increase in social behavior. During a juvenile social play test, it was found that female *Nf1*<sup>+/-</sup> mice spent more relative time performing social interactions. (\*\*\*\**p* < 0.001 by Mann-Whitney test, comparing with time spent in non-social context).
